# Supplementary material
Source: PubMed Central journal article supplement (PMC4269521)
Supplement: NIHMS648323-supplement-Supplemental.pdf [file NIHMS648323-supplement-Supplemental.pdf]

## Supplemental Information

**SUPPLEMENTAL TABLE 3** Bacterial Pathogens Identified in Children Hospitalized With Community-Acquired Pneumonia

| Pathogen                        | Source            | RVP-Positive Patients | RVP-Negative Patients |
|---------------------------------|-------------------|-----------------------|-----------------------|
| <i>Streptococcus pneumoniae</i> | Blood             | 1                     | 1                     |
|                                 | Tracheal aspirate | 5                     | 1                     |
|                                 | Sputum            | 2                     | 0                     |
| <i>Haemophilus influenzae</i>   | Blood             | 1                     | 0                     |
|                                 | Tracheal aspirate | 7                     | 2                     |
| <i>Staphylococcus aureus</i>    | Pleural fluid     | 4                     | 0                     |
|                                 | Blood             | 2                     | 0                     |
|                                 | Tracheal aspirate | 2                     | 0                     |
| <i>Streptococcus pyogenes</i>   | Pleural fluid     | 0                     | 1                     |
| <i>Moraxella catarrhalis</i>    | Tracheal aspirate | 2                     | 0                     |
| <i>Chlamydia trachomatis</i>    | Serology          | 0                     | 1                     |
| <i>Bordetella pertussis</i>     | PCR               | 1                     | 0                     |

One patient had both *S aureus* and *H influenzae* detected on endotracheal aspirate. One patient had *H influenzae* detected on both blood culture and tracheal aspirate. PCR, polymerase chain reaction.

**SUPPLEMENTAL TABLE 4** Non-RSV and RV/EV Pathogens Detected on RVP Testing in Children With Community-Acquired Pneumonia

|                                                    | Other-Virus Positive ( <i>n</i> = 45) |             |              |              |             |             |          |
|----------------------------------------------------|---------------------------------------|-------------|--------------|--------------|-------------|-------------|----------|
|                                                    | All Other Viruses                     | HMpV (14)   | PIV (10)     | IFV (8)      | BV (6)      | CoV (5)     | AdV (2)  |
| Median age, y (IQR)                                | 1 (0.6–4)                             | 1 (0.6–3)   | 1 (0.9–3)    | 4 (0.8–10)   | 0.8 (0.3–1) | 2 (0.1–11)  | 8        |
| <b>Outcomes</b>                                    |                                       |             |              |              |             |             |          |
| Median LOS, d (IQR)                                | 4 (3–9)                               | 4 (2–7)     | 7 (3–11)     | 7 (3–13)     | 3 (2–4)     | 3 (3–25)    | 4.5      |
| Respiratory support                                | 39 (86.7%)                            | 12 (85.7%)  | 10 (100%)    | 6 (75%)      | 6 (100%)    | 5 (100%)    | 2 (100%) |
| Median duration of respiratory support, d (IQR)    | 3 (2–5)                               | 2.5 (1–4)   | 4 (3–6)      | 4 (1–10)     | 2.5 (2–4)   | 2 (1–24)    | 2.5      |
| Intensive care admission                           | 27 (60%)                              | 8 (57.1%)   | 6 (60%)      | 5 (62.5%)    | 4 (66.7%)   | 3 (60%)     | 2 (100%) |
| Invasive mechanical ventilation                    | 15 (33.3%)                            | 2 (14.3%)   | 4 (40%)      | 5 (62.5%)    | 1 (16.7%)   | 2 (40%)     | 1 (50%)  |
| Parenteral antibiotic therapy                      | 43 (95.6%)                            | 13 (92.9%)  | 9 (90%)      | 8 (100%)     | 6 (100%)    | 5 (100%)    | 2 (100%) |
| Median duration of parenteral antibiotics, h (IQR) | 66 (39–167)                           | 43 (20–108) | 160 (50–180) | 104 (34–183) | 69 (35–102) | 66 (44–390) | 131      |

Respiratory support is defined as any supplemental oxygen or positive pressure ventilation. AdV, adenovirus; BV, bocavirus; CoV, coronavirus; HMpV; human metapneumovirus; IFV, influenza virus; PIV, parainfluenza virus; RV/EV: rhinovirus/enterovirus.
